# Supplementary material for: Uncarboxylated osteocalcin alleviates the inhibitory effect of high glucose on osteogenic differentiation of mouse bone marrow–derived mesenchymal stem cells by regulating TP63
Source: PubMed Central journal article supplement (PMC8080387; doi:10.1186/s12860-021-00365-7), 2021-04-27

**Title:**

Uncarboxylated osteocalcin alleviates the inhibitory effect of high glucose on osteogenic differentiation of mouse bone marrow-derived mesenchymal stem cells by regulating TP63

**Authors:**

**Name:** Fangzi Gong

**Address:** Medical School, University of Chinese Academy of Sciences, Beijing, China.

**Name:** Le Gao

**Address:** Medical School, University of Chinese Academy of Sciences, Beijing, China.

**Name:** Luyao Ma

**Address:** Medical School, University of Chinese Academy of Sciences, Beijing, China.

**Name:** Guangxin Li

**Address:** College of sports medicine and physical therapy, Beijing Sport University, Beijing, China.

**Corresponding author:**

**Name:** Jianhong Yang

**Address:** Medical School, University of Chinese Academy of Sciences, Beijing 101400, China.

**Email:** yangjh@ucas.edu.cn

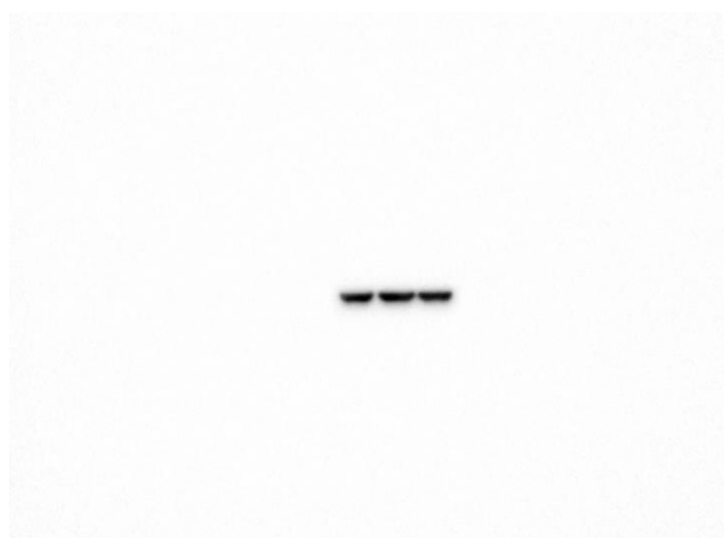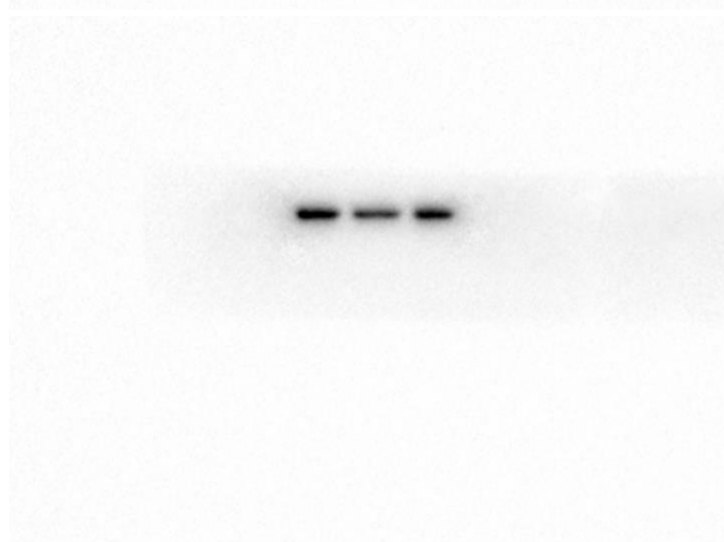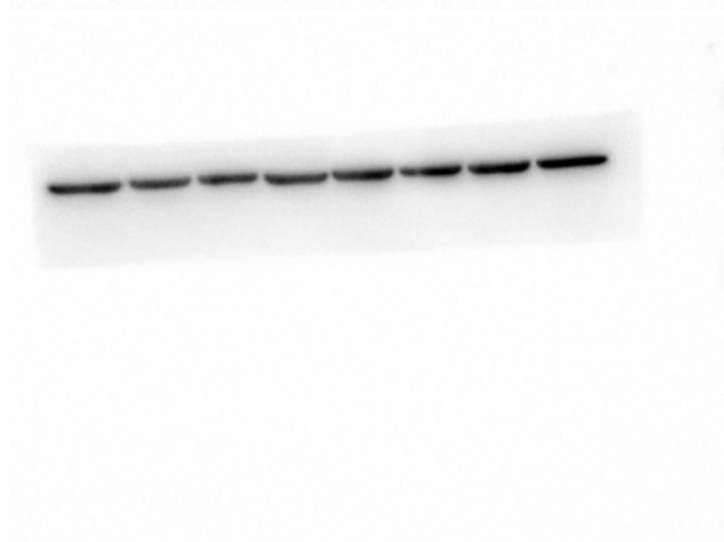

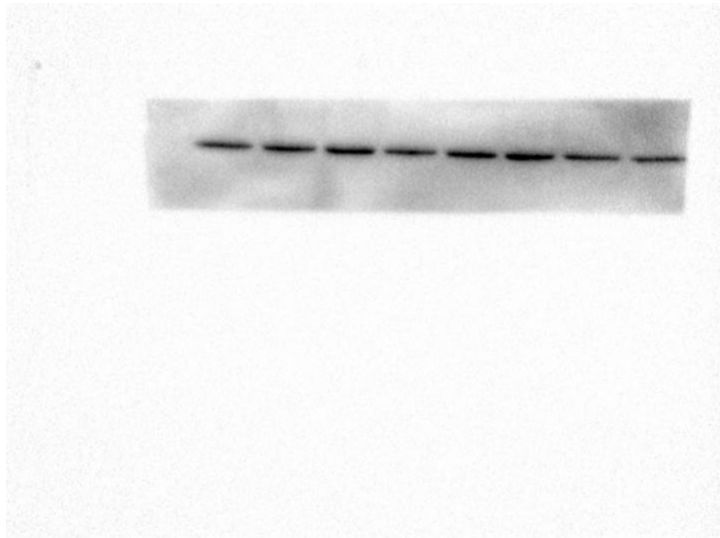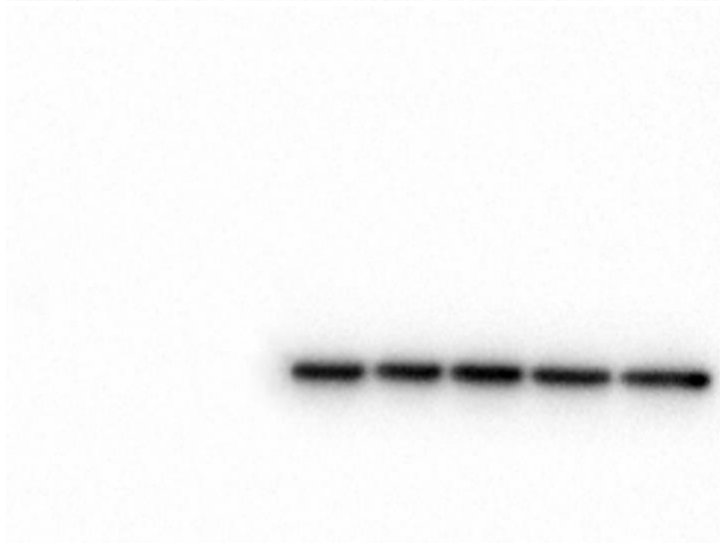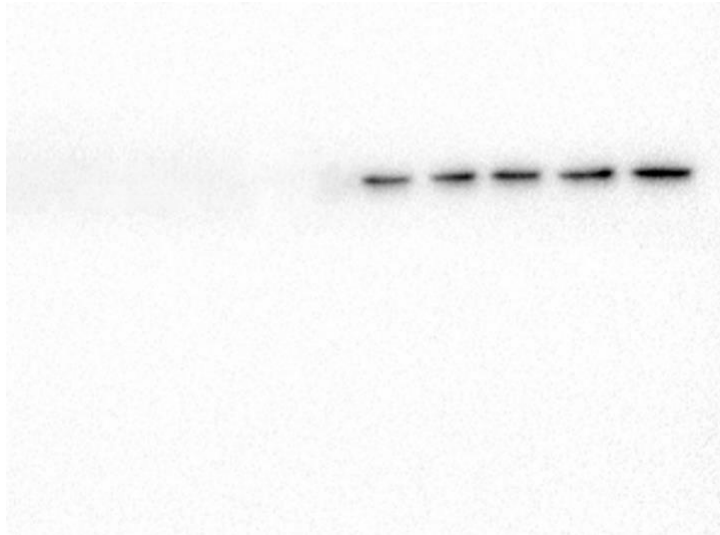

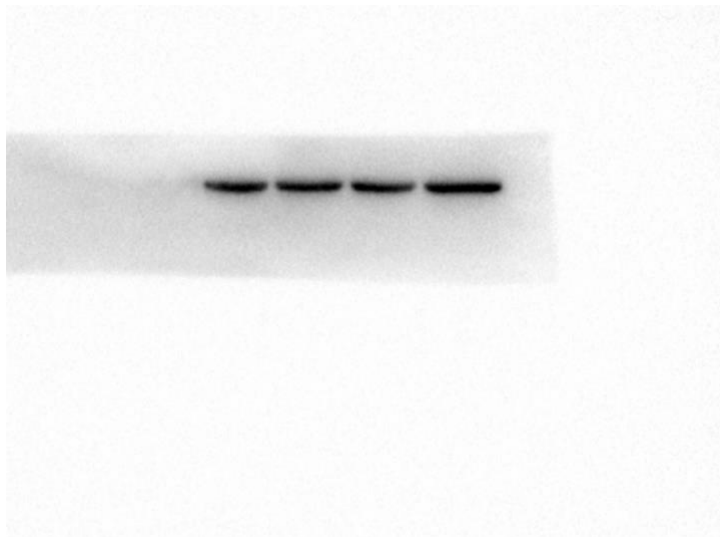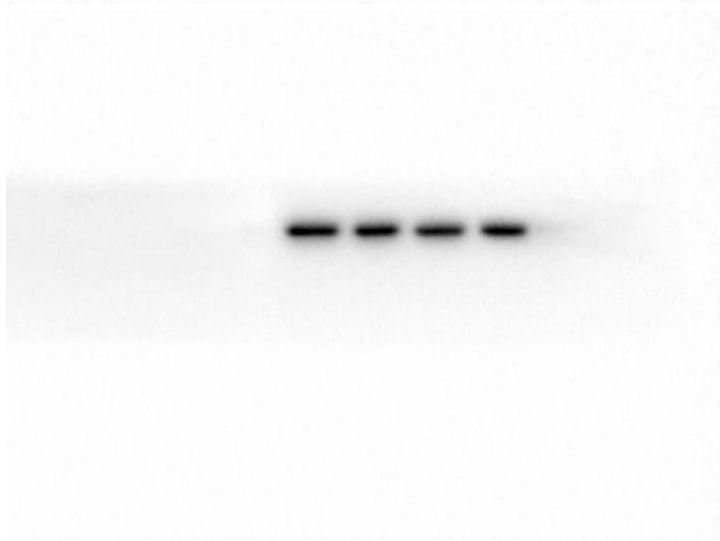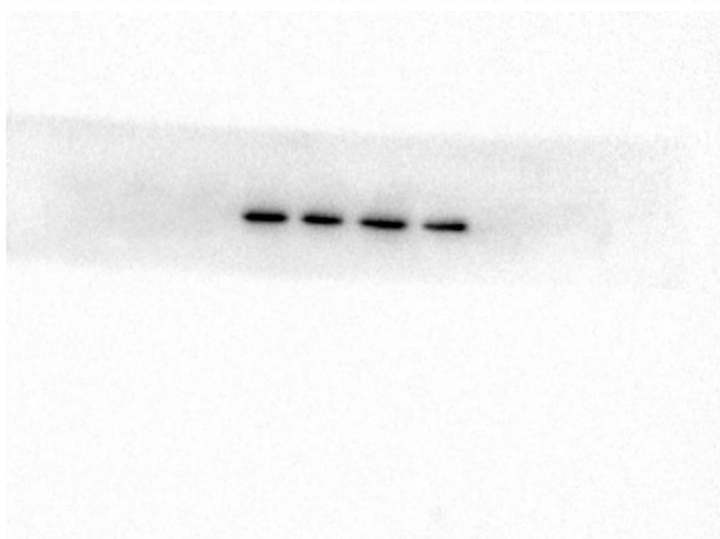

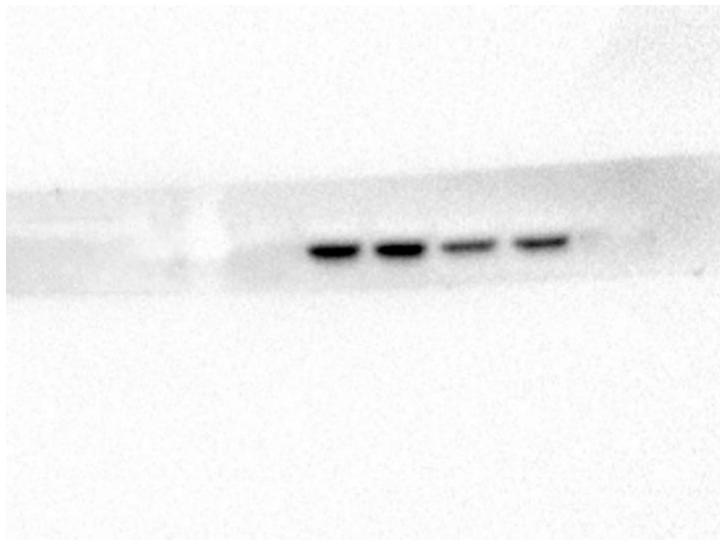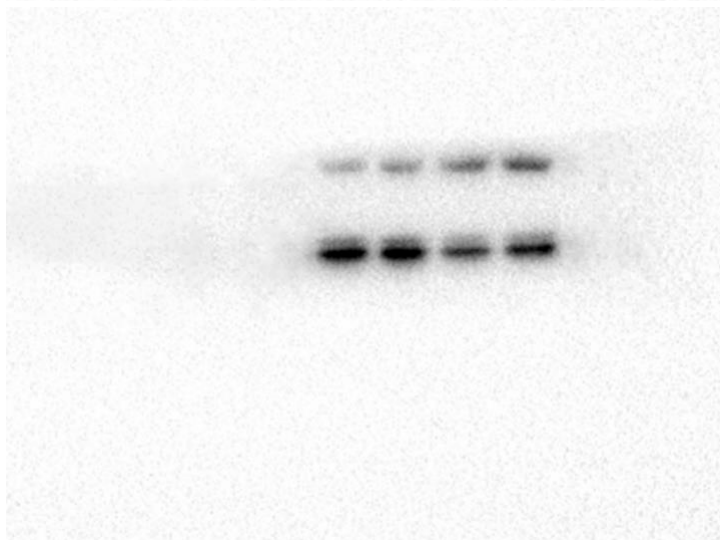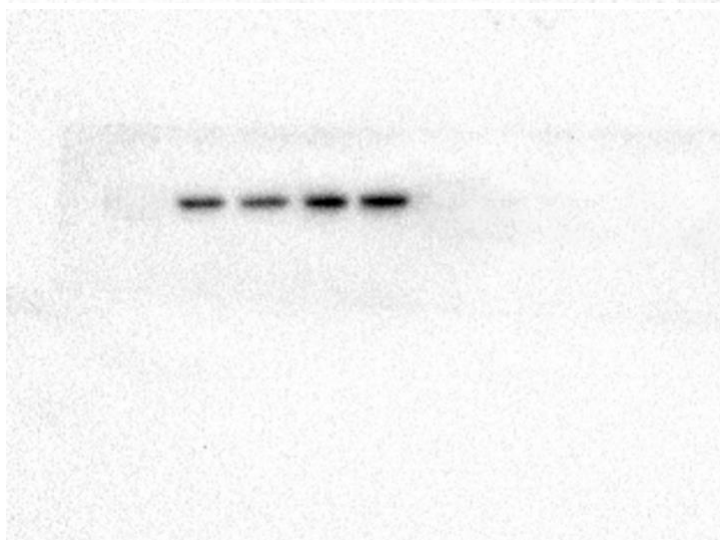

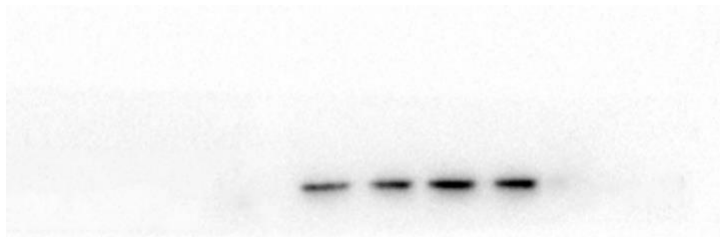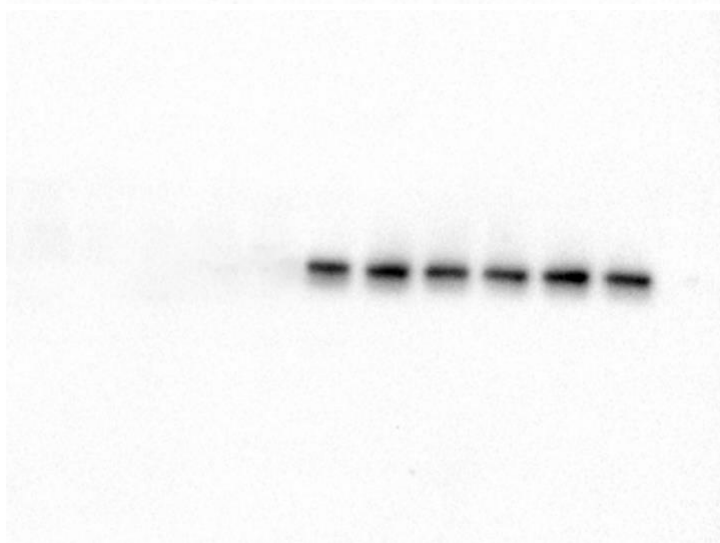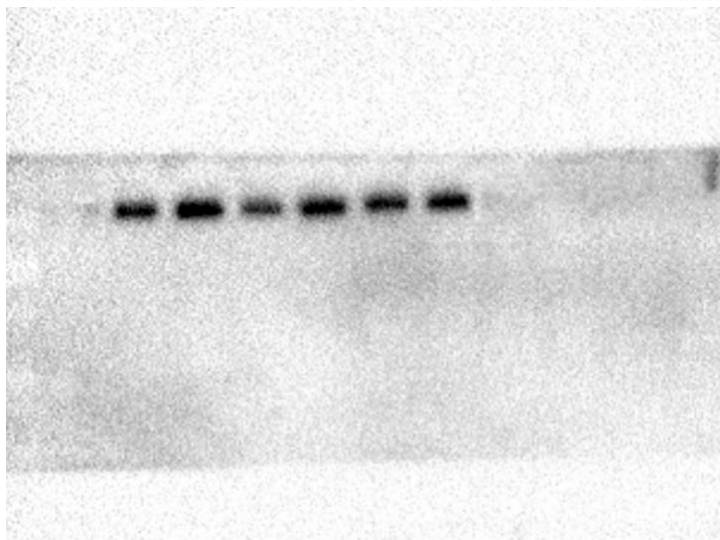

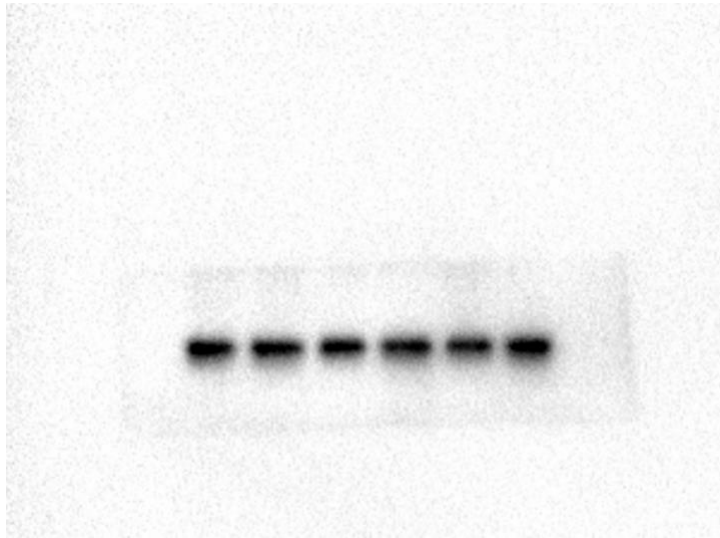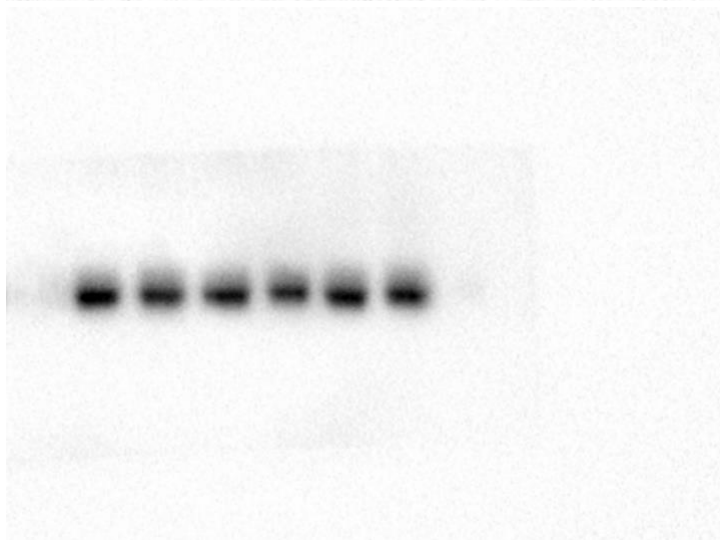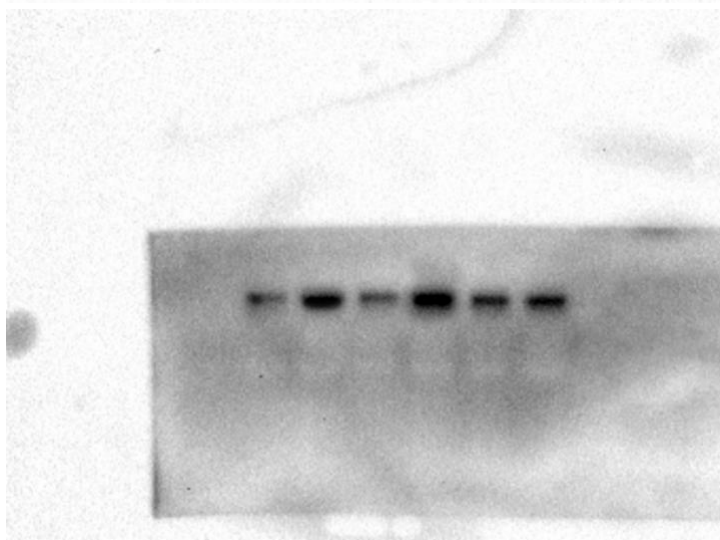

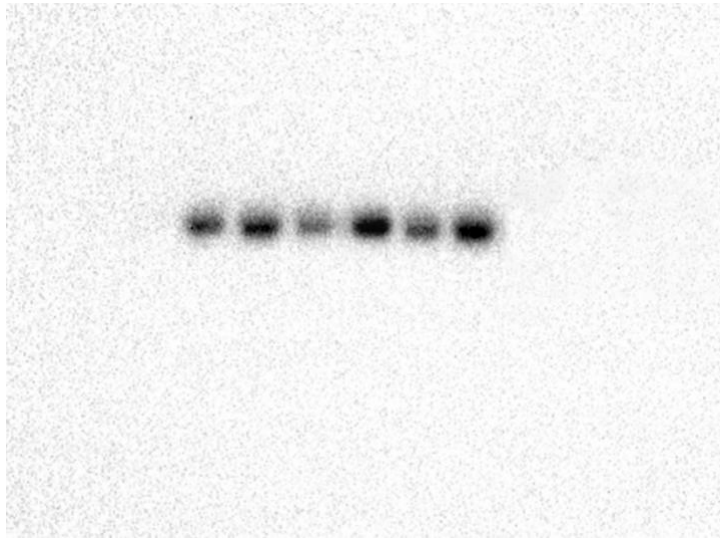

Supplement: 12860_2021_365_MOESM2_ESM.pdf [file 12860_2021_365_MOESM2_ESM.pdf]
